# Supplementary material for: Elevated serum levels of glial fibrillary acidic protein are associated with covert hepatic encephalopathy in patients with cirrhosis
Source: PubMed Central journal article supplement — JHEP Rep. 2023 Jan 18;5(4):100671. doi: 10.1016/j.jhepr.2023.100671 (PMC9972561; doi:10.1016/j.jhepr.2023.100671), 2023-01-18
Supplement: mmc1.pdf [file mmc1.pdf]

# **Elevated serum levels of glial fibrillary acidic protein are associated with covert hepatic encephalopathy in patients with cirrhosis**

Simon Johannes Gairing, Sven Danneberg, Leonard Kaps, Michael Nagel, Eva Maria Schleicher, Charlotte Quack, Sinah Engel, Stefan Bittner, Peter R. Galle, Jörn M. Schattenberg, Marcus-Alexander Wörns, Felix Luessi, Jens U. Marquardt, Christian Labenz

Table of contents

Table S1 ..... **Error! Bookmark not defined.**

**Table S1. Baseline characteristics of the cohort stratified by study sites.**

| Variable                  |                | Mainz<br>n = 85      | Lübeck<br>n = 50      | p-value          |
|---------------------------|----------------|----------------------|-----------------------|------------------|
| Age, y (IQR)              |                | 60 (54; 65)          | 61 (53; 70)           | 0.216            |
| Male gender, n (%)        |                | 37 (44)              | 30 (60)               | 0.065            |
| Aetiology                 | Alcohol, n (%) | 54 (64)              | 26 (52)               | 0.188            |
|                           | Other, n (%)   | 31 (37)              | 24 (48)               |                  |
| Median MELD score (IQR)   |                | 14 (10; 18)          | 10 (7; 14)            | <b>&lt;0.001</b> |
| Child-Pugh A/B/C, n (%)   |                | 36/43/6<br>(42/51/7) | 28/17/5<br>(56/34/10) | 0.172            |
| History of OHE, n (%)     |                | 13 (15)              | 4 (8)                 | 0.217            |
| History of ascites, n (%) |                | 55 (65)              | 29 (58)               | 0.438            |
| Sodium, mmol/l (IQR)      |                | 137 (135;<br>139)    | 139 (136;<br>141)     | <b>0.024</b>     |
| Albumin, g/l (IQR)        |                | 30 (25; 35)          | 39 (31; 44)           | <b>&lt;0.001</b> |
| WBC, /nl (IQR)            |                | 5.1 (3.8; 7.9)       | 6.0 (4.3; 6.6)        | 0.685            |
| GFAP, pg/ml (IQR)         |                | 138 (92;<br>191)     | 137 (74;<br>206)      | 0.532            |
| CHE, n (%)                |                | 37 (44)              | 13 (26)               | <b>0.042</b>     |
| Median PHES (IQR)         |                | -4 (-10; -1)         | -3 (-5; 0)            | 0.052            |

Data are expressed as medians and interquartile ranges (IQR) or as frequencies and percentages; Differences between patients from Mainz vs Lübeck with metric data were evaluated using an unpaired t-test or a Mann-Whitney U Test depending on data distribution. Regarding categorical variables, a chi-square test was applied. MELD, model for end-stage liver disease; WBC, white blood cell count; OHE, overt hepatic encephalopathy; CHE, covert hepatic encephalopathy; PHES, psychometric hepatic encephalopathy score.
